# HydDB: A web tool for hydrogenase classification and analysis

Dan Søndergaard<sup>a</sup>, Christian N. S. Pedersen<sup>a</sup>, Chris Greening<sup>c, d \*</sup>

<sup>a</sup> Aarhus University, Bioinformatics Research Centre, C.F. Møllers Allé 8, Aarhus  
DK-8000, Denmark

<sup>b</sup> Australian National University, Research School of Chemistry, Sullivans Creek  
Road, Acton, ACT 2601, Australia

<sup>c</sup> The Commonwealth Scientific and Industrial Research Organisation, Land and  
Water Flagship, Clunies Ross Street, Acton, ACT 2060, Australia

<sup>d</sup> Monash University, School of Biological Sciences, Clayton, VIC 2800, Australia

## Correspondence:

Dr Chris Greening ([chris.greening@monash.edu](mailto:chris.greening@monash.edu)), Monash University, School of  
Biological Sciences, Clayton, VIC 2800, Australia

Dan Søndergaard ([das@birc.au.dk](mailto:das@birc.au.dk)), Aarhus University, Bioinformatics Research  
Centre, C.F. Møllers Allé 8, Aarhus DK-8000, Denmark

**Short Title:** HydDB, a hydrogenase database

**Figures:** Two colour figures, two tables

## Abstract

H<sub>2</sub> metabolism is the most ancient and diverse mechanism of energy-generation. The metalloenzymes mediating this metabolism, hydrogenases, are encoded by over 60 microbial phyla and are present in all major ecosystems. We developed a classification system and web tool, HydDB, for the structural and functional analysis of these enzymes. We show that hydrogenase function can be predicted by primary sequence alone using an expanded classification scheme (comprising [NiFe]-hydrogenase subgroups, 8 [FeFe]-hydrogenase subtypes, [Fe]-hydrogenases). Using this scheme, we built a web tool that rapidly and reliably classifies hydrogenase primary sequences using a combination of *k*-nearest neighbors' algorithms and CDD referencing. Demonstrating its capacity, the tool reliably predicted hydrogenase content and function in 12 newly-sequenced bacteria, archaea, and eukaryotes. HydDB also provides the capacity to browse 3248 annotated sequences and contains a detailed repository of physiological, biochemical, and structural information about the hydrogenase classes defined here. The database and classifier are freely and publicly available at <http://services.birc.au.dk/hyddb/>

## Introduction

Microorganisms conserve energy by metabolizing H<sub>2</sub>. Oxidation of this high-energy fuel yields electrons that can be used for respiration and carbon-fixation. This diffusible gas is also produced in diverse fermentation and anaerobic respiratory processes<sup>1</sup>. H<sub>2</sub> metabolism contributes to the growth and survival of microorganisms across the three domains of life: chemotrophs and phototrophs, lithotrophs and

heterotrophs, aerobes and anaerobes, mesophiles and extremophiles alike <sup>1,2</sup>. On the ecosystem scale, H<sub>2</sub> supports microbial communities in most terrestrial, aquatic, and host-associated ecosystems <sup>1,3</sup>. It is also generally accepted that H<sub>2</sub> was the primordial electron donor <sup>4</sup>. In biological systems, metalloenzymes known as hydrogenases are responsible for oxidizing and evolving H<sub>2</sub> <sup>1,5</sup>. Our recent survey showed there is a far greater number and diversity of hydrogenases than previously thought <sup>2</sup>. It is predicted over 55 microbial phyla and up to half of all microorganisms harbor hydrogenases <sup>2,6</sup>. Better understanding H<sub>2</sub> metabolism and the enzymes that mediate it also has wider implications, particularly in relation to human health and disease <sup>3,7</sup>, biogeochemical cycling <sup>8</sup>, and renewable energy <sup>9,10</sup>.

There are three classes of hydrogenase, the [NiFe], [FeFe], and [Fe] hydrogenases, that are distinguished by their metal composition. Whereas the [Fe]-hydrogenases are a small methanogenic-specific family <sup>11</sup>, the [NiFe] and [FeFe] classes are widely distributed and functionally diverse. They comprise numerous different groups and subgroups/subtypes with distinct biochemical features (e.g. directionality, affinity, redox partners, and localization) and physiological roles (i.e. respiration, fermentation, bifurcation, sensing) <sup>1,5</sup>. For example, while Group 2a and 2b [NiFe]-hydrogenases share > 35% sequence identity, they have distinct roles as respiratory uptake hydrogenases and H<sub>2</sub> sensors respectively <sup>12,13</sup>. Building on previous work <sup>14,15</sup>, we recently created a comprehensive hydrogenase classification scheme predictive of biological function <sup>2</sup>. This scheme was primarily based on amino acid sequence phylogeny, but also factored in genetic organization, metal-binding motifs, and functional information. This analysis identified 22 subgroups (within four groups)

of [NiFe]-hydrogenases and six subtypes (within three groups) of [FeFe]-hydrogenases, each with unique physiological roles <sup>2</sup>.

In this work, we build on these findings to develop the first web database for the classification and analysis of hydrogenases. We developed an expanded classification scheme that captures the full sequence diversity of hydrogenase enzymes and predicts their biological function. Using this information, we developed a classification tool based on the *k*-nearest neighbors' (*k*-NN) method. This tool is a more reliable, efficient, and user-friendly method for hydrogenase classification than standard approaches involved phylogenetic tree construction, with a precision of more than 99.8%.

## Results and Discussion

### A sequence-based classification scheme for hydrogenases

We initially developed a classification scheme to enable prediction of hydrogenase function by primary sequence alone. To do this, we visualized the relationships between all hydrogenases in sequence similarity networks <sup>16</sup>, in which nodes represent individual proteins and the distances between them reflect BLAST *E*-values. As reflected by our analysis of other protein superfamilies <sup>17,18</sup>, SSNs allow robust inference of sequence-structure-function relationships for large datasets without the problems associated with phylogenetic trees (e.g. long-branch attraction). Consistent with previous phylogenetic analyses <sup>2,14,15</sup>, this analysis showed the hydrogenase sequences clustered into eight major groups (Groups 1 to 4 [NiFe]-hydrogenases, Groups A to C [FeFe]-hydrogenases, [Fe]-hydrogenases), six of which separate into multiple functionally-distinct subgroups or subtypes at narrower

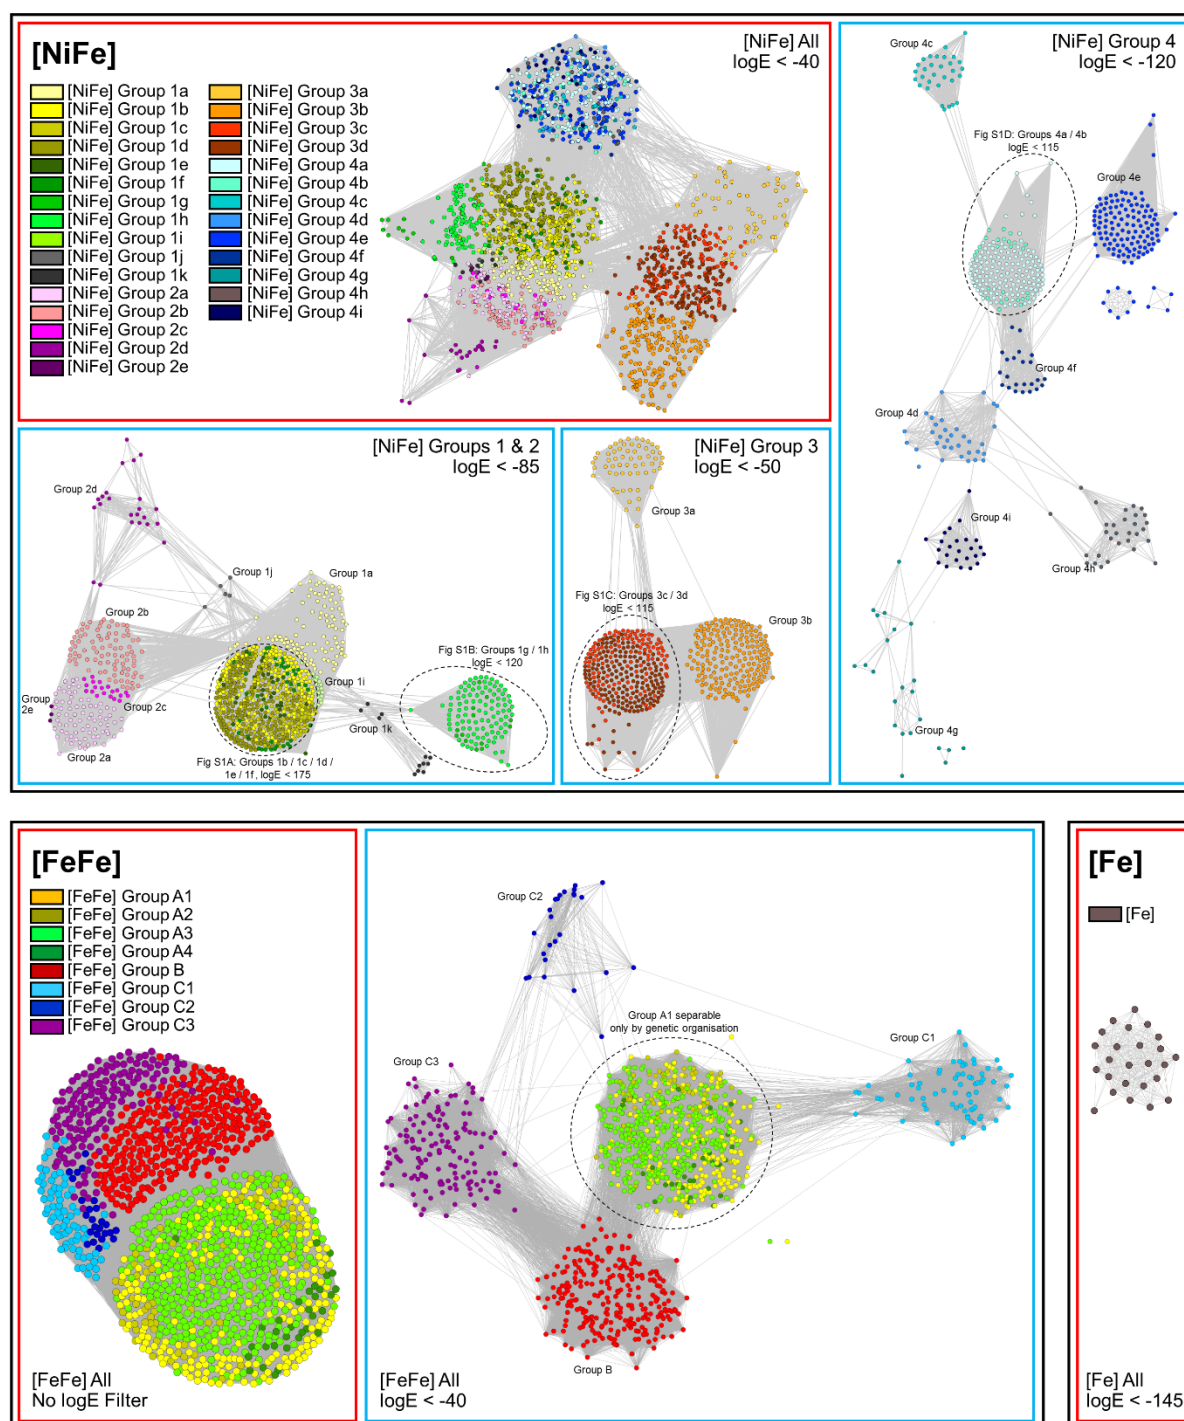

**Figure 1.** Sequence similarity network of hydrogenase sequences. Nodes represent individual proteins and the edges show the BLAST E-values between them at the logE filter defined at the bottom-left of each panel. The sequences are colored by class as defined in the legends. Figure S1 shows the further delineation of the encircled [NiFe] hydrogenase classes.

logE filters (**Figure 1; Figure S1**). The SSNs demonstrated that all [NiFe]-hydrogenase subgroups defined through phylogenetic trees in our previous work <sup>2</sup> separated into distinct clusters, which is consistent with our evolutionary model that such hydrogenases diverged from a common ancestor to adopt multiple distinct functions <sup>2</sup>. The only exception were the Group A [FeFe]-hydrogenases, which as previously-reported <sup>2,15</sup>, cannot be classified by sequence alone as they have principally diversified through changes in domain architecture and quaternary structure. It remains strictly necessary to analyze the organization of the genes encoding these enzymes to determine their specific function, e.g. whether they serve fermentative or electron-bifurcating roles.

The SSN analysis revealed that several groups and subgroups that clustered together in the phylogenetic tree analysis <sup>2</sup> separate into several subclades of probable distinct function (**Figure 1**). On this basis, we refined and expanded the hydrogenase classification scheme to reflect the sequence diversification observed (**Table 1**). Three lineages originally classified as Group 1a [NiFe]-hydrogenases were reclassified as new subgroups, the Coriobacteria (Group 1i), Archaeoglobi (Group 1j), and Methanosarcinales (Group 1i). The previously-defined 4b and 4d subgroups <sup>2</sup> were dissolved, as the SSN analysis confirmed they were highly polyphyletic. These sequences are reclassified here into five new subgroups: the formate- and carbon monoxide-respiring Mrp-linked complexes (Group 4b) <sup>19</sup>, the ferredoxin-coupled Mrp-linked complexes (Group 4d) <sup>20</sup>, the well-described methanogenic Eha (Group 4h) and Ehb (Group 4i) supercomplexes <sup>21</sup>, and a more loosely clustered class of unknown function (Group 4g). Three crenarchaeotal hydrogenases were also classified as their own family (Group 2e); these enzymes

| <b>[NiFe] Group 1: Respiratory H<sub>2</sub>-uptake [NiFe]-hydrogenases</b>   |                                       |                                                                                                                                            |           |
|-------------------------------------------------------------------------------|---------------------------------------|--------------------------------------------------------------------------------------------------------------------------------------------|-----------|
| <b>1a</b>                                                                     | Periplasmic                           | Electron input for sulfate, metal, and organohalide respiration. [NiFeSe] variants.                                                        | 2         |
| <b>1b</b>                                                                     | Prototypical                          | Electron input for sulfate, fumarate, metal, and nitrate respiration.                                                                      | 2         |
| <b>1c</b>                                                                     | Hyb-type                              | Electron input for fumarate, nitrate, and sulfate respiration. Physiologically reversible.                                                 | 2         |
| <b>1d</b>                                                                     | Oxygen-tolerant                       | Electron input for aerobic respiration and oxygen-tolerant anaerobic respiration.                                                          | 2         |
| <b>1e</b>                                                                     | Isp-type                              | Electron input primarily for sulfur respiration. Physiologically reversible.                                                               | 2         |
| <b>1f</b>                                                                     | Oxygen-protecting                     | Unresolved role. May liberate electrons to reduce reactive oxygen species.                                                                 | 2         |
| <b>1g</b>                                                                     | Crenarchaeota-type                    | Electron input primarily for sulfur respiration.                                                                                           | 2         |
| <b>1h</b>                                                                     | Actinobacteria-type                   | Electron input for aerobic respiration. Scavenges electrons from atmospheric H <sub>2</sub> .                                              | 2,22      |
| <b>1i</b>                                                                     | Coriobacteria-type (putative)         | Undetermined role. May liberate electrons for anaerobic respiration.                                                                       | This work |
| <b>1j</b>                                                                     | Archaeoglobi-type                     | Electron input for sulfate respiration <sup>23</sup> .                                                                                     | This work |
| <b>1k</b>                                                                     | Methanophenazine-reducing             | Electron input for methanogenic heterodisulfide respiration <sup>24</sup> .                                                                | This work |
| <b>[NiFe] Group 2: Alternative and sensory uptake [NiFe]-hydrogenases</b>     |                                       |                                                                                                                                            |           |
| <b>2a</b>                                                                     | Cyanobacteria-type                    | Electron input for aerobic respiration. Recycles H <sub>2</sub> produced by other cellular processes.                                      | 14        |
| <b>2b</b>                                                                     | Histidine kinase-linked               | H <sub>2</sub> sensing. Activates two-component system controlling hydrogenase expression.                                                 | 14        |
| <b>2c</b>                                                                     | Diguanylate cyclase-linked (putative) | Undetermined role. May sense H <sub>2</sub> and regulate processes through cyclic di-GMP production.                                       | 2         |
| <b>2d</b>                                                                     | Aquificae-type                        | Unresolved role. May generate reductant for carbon fixation or have a regulatory role.                                                     | 2         |
| <b>2e</b>                                                                     | Metallosphaera-type (putative)        | Undetermined role. May liberate electrons primarily for aerobic respiration <sup>25</sup> .                                                | This work |
| <b>[NiFe] Group 3: Cofactor-coupled bidirectional [NiFe]-hydrogenases</b>     |                                       |                                                                                                                                            |           |
| <b>3a</b>                                                                     | F <sub>420</sub> -coupled             | Couples oxidation of H <sub>2</sub> to reduction of F <sub>420</sub> during methanogenesis. Physiologically reversible. [NiFeSe] variants. | 14        |
| <b>3b</b>                                                                     | NADP-coupled                          | Couples oxidation of NADPH to evolution of H <sub>2</sub> . Physiologically reversible. May have sulfhydrogenase activity.                 | 14        |
| <b>3c</b>                                                                     | Heterodisulfide reductase-linked      | Bifurcates electrons from H <sub>2</sub> to heterodisulfide and Fd <sub>ox</sub> in methanogens. [NiFeSe] variants.                        | 14        |
| <b>3d</b>                                                                     | NAD-coupled                           | Interconverts electrons between H <sub>2</sub> and NAD depending on cellular redox state.                                                  | 14        |
| <b>[NiFe] Group 4: Respiratory H<sub>2</sub>-evolving [NiFe]-hydrogenases</b> |                                       |                                                                                                                                            |           |
| <b>4a</b>                                                                     | Formate hydrogenlyase                 | Couples formate oxidation to fermentative H <sub>2</sub> evolution. May be H <sup>+</sup> -translocating.                                  | 2         |
| <b>4b</b>                                                                     | Formate-respiring                     | Respires formate or carbon monoxide using H <sup>+</sup> as electron acceptor. Na <sup>+</sup> -translocating via Mrp <sup>19</sup> .      | This work |
| <b>4c</b>                                                                     | Carbon monoxide-respiring             | Respires carbon monoxide using H <sup>+</sup> as electron acceptor. H <sup>+</sup> -translocating.                                         | 2         |

|                            |                                           |                                                                                                                                                          |           |
|----------------------------|-------------------------------------------|----------------------------------------------------------------------------------------------------------------------------------------------------------|-----------|
| <b>4d</b>                  | Ferredoxin-coupled, Mrp-linked            | Couples Fd <sub>red</sub> oxidation to H <sup>+</sup> reduction. Na <sup>+</sup> -translocating via Mrp complex <sup>20</sup> .                          | This work |
| <b>4e</b>                  | Ferredoxin-coupled, Ech-type              | Couples Fd <sub>red</sub> oxidation to H <sup>+</sup> reduction. Physiologically reversible via H <sup>+</sup> /Na <sup>+</sup> translocation.           | 2         |
| <b>4f</b>                  | Formate-coupled (putative)                | Undetermined role. May couple formate oxidation to H <sub>2</sub> evolution and H <sup>+</sup> translocation.                                            | 2         |
| <b>4g</b>                  | Ferredoxin-coupled (putative)             | Undetermined role. May couple Fd <sub>red</sub> oxidation to proton reduction and H <sup>+</sup> /Na <sup>+</sup> translocation.                         | This work |
| <b>4h</b>                  | Ferredoxin-coupled, Eha-type              | Couples Fd <sub>red</sub> oxidation to H <sup>+</sup> reduction in anaplerotic processes. H <sup>+</sup> /Na <sup>+</sup> -translocating <sup>21</sup> . | This work |
| <b>4i</b>                  | Ferredoxin-coupled, Ehb-type              | Couples Fd <sub>red</sub> oxidation to H <sup>+</sup> reduction in anabolic processes. H <sup>+</sup> /Na <sup>+</sup> -translocating <sup>21</sup> .    | This work |
| <b>[FeFe] Hydrogenases</b> |                                           |                                                                                                                                                          |           |
| <b>A1</b>                  | Prototypical                              | Couples ferredoxin oxidation to fermentative or photobiological H <sub>2</sub> evolution.                                                                | 2,15      |
| <b>A2</b>                  | Glutamate synthase-linked (putative)      | Undetermined role. May couple H <sub>2</sub> oxidation to NAD reduction, generating reductant for glutamate synthase.                                    | 2,15      |
| <b>A3</b>                  | Bifurcating                               | Reversibly bifurcates electrons from H <sub>2</sub> to NAD and Fd <sub>ox</sub> in anaerobic bacteria.                                                   | 2,15      |
| <b>A4</b>                  | Formate dehydrogenase-linked              | Couples formate oxidation to H <sub>2</sub> evolution. Some bifurcate electrons from H <sub>2</sub> to ferredoxin and NADP.                              | 2,15      |
| <b>B</b>                   | Colonic-type (putative)                   | Undetermined role. May couple Fd <sub>red</sub> oxidation to fermentative H <sub>2</sub> evolution.                                                      | 15        |
| <b>C1</b>                  | Histidine kinase-linked (putative)        | Undetermined role. May sense H <sub>2</sub> and regulate processes via histidine kinases <sup>2</sup> .                                                  | This work |
| <b>C2</b>                  | Chemotactic (putative)                    | Undetermined role. May sense H <sub>2</sub> and regulate processes via methyl-accepting chemotaxis proteins <sup>2</sup> .                               | This work |
| <b>C3</b>                  | Phosphatase-linked (putative)             | Undetermined role. May sense H <sub>2</sub> and regulate processes via serine/threonine phosphatases <sup>2</sup> .                                      | This work |
| <b>[Fe] Hydrogenases</b>   |                                           |                                                                                                                                                          |           |
| <b>All</b>                 | Methenyl-H <sub>4</sub> MPT dehydrogenase | Reversibly couples H <sub>2</sub> oxidation to 5,10-methenyltetrahydromethanopterin reduction.                                                           | 14        |

127

128 **Table 1.** Expanded classification scheme for hydrogenase enzymes. The majority of the classes were defined in previous work  
129 2,14,15,22. The [NiFe] Group 1i, 1j, 1j, 2e, 4d, 4g, 4h, and 4i enzymes and [FeFe] Groups C1, C2, and C3 enzymes were defined in  
130 this work based on their separation into distinct clusters in the SSN analysis (**Figure 1**). HydDB contains detailed information on  
131 each of these classes, including their taxonomic distribution, genetic organization, biochemistry, and structures, as well a list of  
132 primary references.



enable certain crenarchaeotes to grow aerobically on O<sub>2</sub><sup>25,26</sup> and hence may represent a unique lineage of aerobic uptake hydrogenases currently underrepresented in genome databases. The Group C [FeFe]-hydrogenases were also separated into three main subtypes given they separate into distinct clusters even at relatively broad logE values (**Figure 1**); these enzymes likely have a sensory role<sup>2,15</sup> and are each co-transcribed with different regulatory elements (**Table 1**).

### **HydDB reliably predicts hydrogenase class using the *k*-NN method and CDD referencing**

Using this information, we built a web tool to classify hydrogenases. Hydrogenase classification is determined through a two-step process following input of the catalytic subunit sequence. In the first, the Conserved Domain Database (CDD)<sup>27</sup> is referenced to confirm that the inputted sequence has a hydrogenase catalytic domain, i.e. “Complex1\_49kDa superfamily” (cl21493) (for NiFe-hydrogenases), “Fe\_hyd\_Ig\_C superfamily” (cl14953) (for FeFe-hydrogenases), and “HMD” (pfam03201) (for Fe-hydrogenases). The sequence is subsequently classified through the *k*-NN method that determines the most similar sequences listed in the HydDB reference database. To determine the optimal *k* for the dataset, we performed a 5-fold cross-validation for *k* = 1...10 and computed the accuracy for each *k*. The results are shown in **Figure 2**. The classifier predicted the classes of the 3248 hydrogenase sequences with 99.8% accuracy and high robustness when performing a 5-fold cross-validation (as described in the Methods section) for *k* = 4. The six sequences where there were discrepancies between the SSN and *k*-NN predictions are shown in **Table S1**. The classifier has also been trained to detect and

exclude protein families that are homologous to hydrogenases but do not metabolize H<sub>2</sub> (Nuo, Ehr, NARF, HmdII<sup>1,2</sup>) using reference sequences of these proteins.

**Figure 2.** Evaluation of the  $k$ -NN classifier for  $k = 1 \dots 10$ . For each  $k$ , a 5-fold cross-validation was performed. The mean accuracy  $\pm$  two standard deviations of the folds is shown in the figure (note the y-axis).  $k = 1$  provides the most accurate classifier. However,  $k = 4$  provides almost the same accuracy and is more robust to errors in the training set (reflected by the lower standard deviation). In general, the standard deviation is very small, indicating that the predictions are robust to changes in the training data.

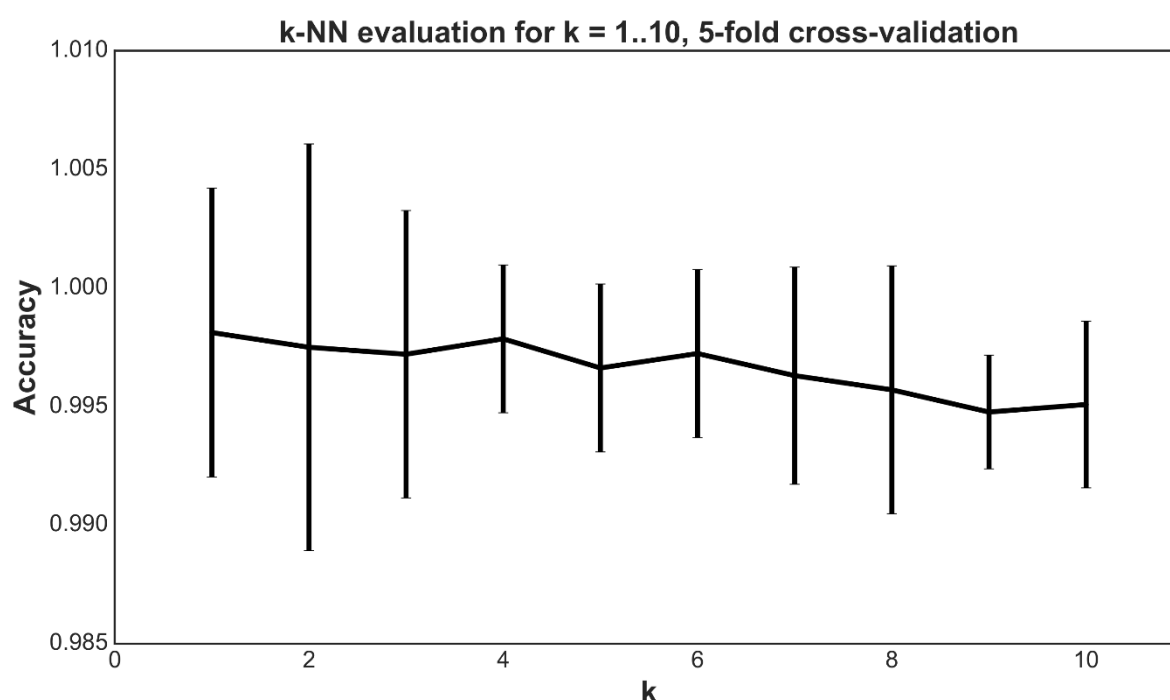

Sequences of the [FeFe] Group A can be classified into functionally-distinct subtypes (A1, A2, A3, A4) based on genetic organization<sup>2</sup>. The classifier can classify such hydrogenases if the protein sequence immediately downstream from the catalytic subunit sequence is provided. The classifier references the CDD to search for conserved domains in the downstream protein sequence. A sequence is classified

as [FeFe] Group A2 if one of the domains “GltA”, “GltD”, “glutamate synthase small subunit” or “putative oxidoreductase”, but not “NuoF”, is found in the sequence. Sequences are classified as [FeFe] Group A3 if the domain “NuoF” is found and [FeFe] Group A4 if the domain “HycB” is present. If none of the domains are found, the sequence is classified as A1. These classification rules were determined by collecting 69 downstream protein sequences. The sequences were then submitted to the CDD and the domains which most often occurred in each subtype were extracted.

In addition to its accuracy, the classifier is superior to other approaches due to its usability (**Figure S2**). It is accessible as a free web service at <http://services.birc.au.dk/hyddb/> HydDB allows the users to paste or upload sequences of hydrogenase catalytic subunit sequences in FASTA format and run the classification. When analysis has completed, results are presented in a table that can be downloaded as a CSV file. This provides an efficient and user-friendly way to classify hydrogenases, in contrast to the previous standard which requires visualization of multiple sequence alignments in phylogenetic trees <sup>28</sup>.

## **HydDB infers the physiological roles of H<sub>2</sub> metabolism**

As summarized in **Table 1**, hydrogenase class is strongly correlated with physiological role. As a result, the classifier is capable of predicting both the class and function of a sequenced hydrogenase. To demonstrate this capacity, we used HydDB to analyze the hydrogenases present in 12 newly-sequenced bacteria, archaea, and eukaryotes of major ecological significance. The classifier correctly classified all 24 hydrogenases identified in the sequenced genomes, as validated

with SSNs (**Table 2**). On the basis of these classifications, the physiological roles of H<sub>2</sub> metabolism were predicted (**Table 2**). For five of the organisms, these predictions are confirmed or supported by previously published data <sup>26,29–32</sup>. Other predictions are in line with metabolic models derived from metagenome surveying <sup>33–35</sup>. In some cases, the capacity for organisms to metabolize H<sub>2</sub> was not tested or inferred in previous studies despite the presence of hydrogenases in the sequenced genomes <sup>30,36–38</sup>.

While HydDB serves as a reliable initial predictor of hydrogenase class and function, further analysis is recommended to verify predictions. Hydrogenase sequences only provide organism with the genetic capacity to metabolise H<sub>2</sub>; their function is ultimately modulated by their expression and integration within the cell <sup>1,39</sup>. In addition, some classifications are likely to be overgeneralized due to lack of functional and biochemical characterization of certain lineages and sublineages. For example, it is not clear if two distant members of the Group 1h [NiFe]-hydrogenases (*Robiginitalea biformata*, *Sulfolobus islandicus*) perform the same H<sub>2</sub>-scavenging functions as the core group <sup>8</sup>. Likewise, it seems probable that the Group 3a [NiFe]-hydrogenases of *Thermococci* and *Aquificae* use a distinct electron donor to the main class <sup>40</sup>. Prominent cautions are included in the enzyme pages in cases such as these. HydDB will be updated when literature is published that influences functional assignments.

## **HydDB contains interfaces for hydrogenase browsing and analyzing**

In addition to its classification function, HydDB is designed to be a definitive repository for hydrogenase retrieval and analysis. The database presently contains

| Organism                               | Phylum                         | Hydrogenase accession no.                                            | HydDB classification                                                     | SSN classification                                                       | Predicted H <sub>2</sub> metabolism                                                                                   | Confirmed H <sub>2</sub> metabolism                                              |
|----------------------------------------|--------------------------------|----------------------------------------------------------------------|--------------------------------------------------------------------------|--------------------------------------------------------------------------|-----------------------------------------------------------------------------------------------------------------------|----------------------------------------------------------------------------------|
| <i>Pyrinomonas methylaliphatogenes</i> | Acidobacteria                  | WP_041979300.1                                                       | [NiFe] Group 1h                                                          | [NiFe] Group 1h                                                          | Persistence by aerobic respiration of atmospheric H <sub>2</sub>                                                      | Confirmed experimentally <sup>29</sup>                                           |
| <i>Phaeodactylibacter xiamenensis</i>  | Bacteroidetes                  | WP_044227713.1<br>WP_044216927.1<br>WP_044227053.1                   | [NiFe] Group 1d<br>[NiFe] Group 2a<br>[NiFe] Group 3d                    | [NiFe] Group 1d<br>[NiFe] Group 2a<br>[NiFe] Group 3d                    | Chemolithoautotrophic growth by aerobic H <sub>2</sub> oxidation                                                      | Bacterium grows aerobically, but H <sub>2</sub> oxidation untested <sup>30</sup> |
| <i>Bathyarchaeota archaeon BA1</i>     | Bathyarchaeota                 | KPV62434.1<br>KPV62673.1<br>KPV62298.1                               | [NiFe] Group 3c<br>[NiFe] Group 3c<br>[NiFe] Group 4g                    | [NiFe] Group 3c<br>[NiFe] Group 3c<br>[NiFe] Group 4g                    | Couples Fd <sub>red</sub> oxidation to H <sub>2</sub> evolution in energy-conserving and bifurcating processes        | Unconfirmed but consistent with metagenome-based models <sup>34</sup>            |
| <i>Lenisia limosa</i>                  | Proteobacteria (Epsilon class) | LenisMan28                                                           | [FeFe] Group A1                                                          | [FeFe] Group A                                                           | Fermentative evolution of H <sub>2</sub>                                                                              | Confirmed experimentally <sup>32</sup>                                           |
| <i>Acidianus copahuensis</i>           | Crenarchaeota                  | WP_048100721.1<br>WP_048100713.1<br>WP_048100378.1<br>WP_048100359.1 | [NiFe] Group 1g<br>[NiFe] Group 1g<br>[NiFe] Group 1h<br>[NiFe] Group 2e | [NiFe] Group 1g<br>[NiFe] Group 1g<br>[NiFe] Group 1h<br>[NiFe] Group 2e | Chemolithoautotrophic growth by H <sub>2</sub> oxidation using O <sub>2</sub> or S <sub>0</sub> as electron acceptors | Partially confirmed experimentally <sup>26</sup>                                 |
| <i>Arcobacter</i> sp. E1/2/3           | Proteobacteria (Epsilon class) | Arc.peg.2312                                                         | [NiFe] Group 1b                                                          | [NiFe] Group 1b                                                          | Chemolithoautotrophic growth by anaerobic H <sub>2</sub> oxidation                                                    | Confirmed experimentally <sup>32</sup>                                           |
| <i>Methanoperedens nitroreducens</i>   | Euryarchaeota (ANME)           | WP_048088262.1<br>WP_048090768.1                                     | [NiFe] Group 3b<br>[NiFe] Group 3b                                       | [NiFe] Group 3b<br>[NiFe] Group 3b                                       | Secondary role for H <sub>2</sub> metabolism limited to fermentative evolution of H <sub>2</sub>                      | Unconfirmed but consistent with metagenome-based models <sup>33</sup>            |
| <i>Kryptonium thompsoni</i>            | Kryptonia                      | CUU03002.1<br>CUU06124.1                                             | [NiFe] Group 1d<br>[NiFe] Group 3b                                       | [NiFe] Group 1d<br>[NiFe] Group 3b                                       | Chemolithoautotrophic growth by aerobic H <sub>2</sub> oxidation, fermentative evolution of H <sub>2</sub> .          | Untested, candidate phylum identified by metagenomics <sup>37</sup>              |
| <i>Lokiarchaeum</i> sp. GC14_75        | Lokiarchaeota                  | KKK40681.1                                                           | [NiFe] Group 3c                                                          | [NiFe] Group 3c                                                          | Bifurcates electrons between H <sub>2</sub> , heterodisulfide, and ferredoxin                                         | Unconfirmed but consistent with metagenome-based models <sup>41</sup>            |

|                                |                   |                          |                                    |                                    |                                                                                                                |                                                                       |
|--------------------------------|-------------------|--------------------------|------------------------------------|------------------------------------|----------------------------------------------------------------------------------------------------------------|-----------------------------------------------------------------------|
| Nitrospira<br>moscoviensis     | Nitrospirae       | WP_053379275.1           | [NiFe] Group 2a                    | [NiFe] Group 2a                    | Chemolithoautotrophic growth by aerobic H <sub>2</sub> oxidation                                               | Confirmed experimentally <sup>31</sup>                                |
| Bacterium<br>GW2011_GWE1_35_17 | Moranbacteria     | KKQ46070.1<br>KKQ45273.1 | [NiFe] Group 1a<br>[NiFe] Group 3b | [NiFe] Group 1a<br>[NiFe] Group 3b | Chemolithoautotrophic growth by anaerobic H <sub>2</sub> oxidation, fermentative evolution of H <sub>2</sub> . | Unconfirmed but consistent with metagenome-based models <sup>35</sup> |
| Bacterium<br>GW2011_GWA2_33_10 | Peregrinibacteria | KKP36897.1               | [FeFe] Group A3                    | [FeFe] Group A                     | Bifurcates electrons between H <sub>2</sub> , NADH, and ferredoxin                                             | Unconfirmed but consistent with metagenome-based models <sup>35</sup> |
| Entotheonella sp.<br>TSY1      | Tectomicrobia     | ETW97737.1<br>ETW94065.1 | [NiFe] Group 1h<br>[NiFe] Group 3b | [NiFe] Group 1h<br>[NiFe] Group 3b | Persistence by aerobic respiration of atmospheric H <sub>2</sub> , fermentative evolution of H <sub>2</sub>    | Untested, candidate phylum identified by metagenomics <sup>38</sup>   |

223

224 **Table 2.** Predictive capacity of the HydDB. HydDB accurately determined hydrogenase content and predicted the physiological roles of H<sub>2</sub>

225 metabolism in 12 newly-sequenced archaeal and bacterial species.

entries for 3248 hydrogenases, including their NCBI accession numbers, amino acid sequence, hydrogenase class, taxonomic affiliation, and predicted behavior (**Figure S2**). To enable easy exploration of the data set, the database also provides access to an interface for searching, filtering, and sorting the data, as well as the capacity to download the results in CSV or FASTA format. There are individual pages for the 38 hydrogenase classes defined here (**Table 1**), including descriptions of their physiological role, genetic organization, taxonomic distribution, and biochemical features. This is supplemented with a compendium of structural information about the hydrogenases, which is integrated with the Protein Databank (PDB), as well as a library of over 1000 literature references (**Figure S5**).

## Conclusions

To summarize, HydDB is a definitive resource for hydrogenase classification and analysis. The classifier described here provides a reliable, efficient, and convenient tool for hydrogenase classification and functional prediction. HydDB also provides browsing tools for the rapid analysis and retrieval of hydrogenase sequences. Finally, the manually-curated repository of class descriptions, hydrogenase structures, and literature references provide a deep but accessible resource for understanding hydrogenases.

## Materials and Methods

### Sequence datasets

The database was constructed using the amino acid sequences of all curated non-redundant 3248 hydrogenase catalytic subunits represented in the NCBI RefSeq

database in August 2014 <sup>2</sup> (**Dataset S1**). In order to test the classification tool, additional sequences from newly-sequenced archaeal and bacteria phyla were retrieved from the Joint Genome Institute's Integrated Microbial Genomes database

<sup>42</sup>.

## Sequence similarity networks

Sequence similarity networks (SSNs) <sup>16</sup> were used to visualize the distribution and diversity of the 3248 retrieved hydrogenase sequences. In this analysis, nodes represent individual proteins and edges represent the all-versus-all BLAST *E*-values. Three networks were constructed using Cytoscape, namely for the [NiFe]-hydrogenase large subunit sequences, [FeFe]-hydrogenase catalytic domain sequences, and [Fe]-hydrogenase sequences. The relationships between them were viewed at different  $\log E$  cutoffs using different subsets of sequences.

## Classification method

The *k*-NN method is a well-known machine learning method for classification <sup>43</sup>. Given a set of data points  $x_1, x_2, \dots, x_N$  (e.g. sequences) with known labels  $y_1, y_2, \dots, y_N$  (e.g. type annotations), the label of a point,  $x$ , is predicted by computing the distance from  $x$  to  $x_1, x_2, \dots, x_N$  and extracting the *k* labeled points closest to  $x$ , i.e. the neighbors. The predicted label is then determined by majority vote of the labels of the neighbors. The distance measure applied here is that of a BLAST search. Thus, the classifier corresponds to a homology search where the types of the top *k* results are considered. However, formulating the classification method as a machine learning problem allows the use of common evaluation methods to estimate the accuracy of the method and perform model selection. The classifier was evaluated



using  $k$ -fold cross-validation. The dataset is first split in to  $k$  parts of equal size.  $k - 1$  parts (the *training set*) are then used for training the classifier and the labels of the data points in the remaining part (the *test set*) are then predicted. This process, called a *fold*, is repeated  $k$  times. The predicted labels of each fold are then compared to the known labels and an accuracy can be computed.

## Acknowledgements

We thank A/Prof Colin J. Jackson, Dr Hafna Ahmed, Dr Andrew Warden, and Dr Stephen Pearce for their helpful advice and comments regarding this manuscript. This work was supported by a PUMPkin Centre of Excellence PhD Scholarship awarded to DS, an Australian National University PhD Scholarship awarded to FHA, and a CSIRO Office of the Chief Executive Postdoctoral Fellowship awarded to CG.

## Author Contributions

CG and DS designed experiments. DS and CG performed experiments. CG, DS, and CNSP analysed data. CNSP supervised students. CG and DS wrote the paper.

**The authors declare no conflict of interest.**

## References

1. Schwartz, E., Fritsch, J. & Friedrich, B. *H<sub>2</sub>-metabolizing prokaryotes*. (Springer Berlin Heidelberg, 2013).
2. Greening, C. *et al.* Genome and metagenome surveys of hydrogenase diversity indicate H<sub>2</sub> is a widely-utilised energy source for microbial growth and survival. *ISME J.* **10**, 761–777 (2016).

3. Cook, G. M., Greening, C., Hards, K. & Berney, M. in *Advances in Bacterial Pathogen Biology* (ed. Poole, R. K.) **65**, 1–62 (Academic Press, 2014).
4. Lane, N., Allen, J. F. & Martin, W. How did LUCA make a living? Chemiosmosis in the origin of life. *BioEssays* **32**, 271–280 (2010).
5. Lubitz, W., Ogata, H., Rüdiger, O. & Reijerse, E. Hydrogenases. *Chem. Rev.* **114**, 4081–148 (2014).
6. Peters, J. W. *et al.* [FeFe]- and [NiFe]-hydrogenase diversity, mechanism, and maturation. *Biochim. Biophys. Acta - Mol. Cell Res.* (2014). doi:10.1016/j.bbamcr.2014.11.021
7. Carbonero, F., Benefiel, A. C. & Gaskins, H. R. Contributions of the microbial hydrogen economy to colonic homeostasis. *Nat Rev Gastroenterol Hepatol* **9**, 504–518 (2012).
8. Greening, C. *et al.* Atmospheric hydrogen scavenging: from enzymes to ecosystems. *Appl. Environ. Microbiol.* **81**, 1190–1199 (2015).
9. Levin, D. B., Pitt, L. & Love, M. Biohydrogen production: prospects and limitations to practical application. *Int. J. Hydrogen Energy* **29**, 173–185 (2004).
10. Cracknell, J. A., Vincent, K. A. & Armstrong, F. A. Enzymes as working or inspirational catalysts for fuel cells and electrolysis. *Chem. Rev.* **108**, 2439–2461 (2008).
11. Shima, S. *et al.* The crystal structure of [Fe]-Hydrogenase reveals the geometry of the active site. *Science* **321**, 572–575 (2008).
12. Lenz, O. & Friedrich, B. A novel multicomponent regulatory system mediates H<sub>2</sub> sensing in *Alcaligenes eutrophus*. *Proc. Natl. Acad. Sci. U. S. A.* **95**, 12474–12479 (1998).
13. Greening, C., Berney, M., Hards, K., Cook, G. M. & Conrad, R. A soil actinobacterium scavenges atmospheric H<sub>2</sub> using two membrane-associated, oxygen-dependent [NiFe] hydrogenases. *Proc. Natl. Acad. Sci. U. S. A.* **111**, 4257–4261 (2014).
14. Vignais, P. M., Billoud, B. & Meyer, J. Classification and phylogeny of hydrogenases. *FEMS Microbiol. Rev.* **25**, 455–501 (2001).
15. Calusinska, M., Happe, T., Joris, B. & Wilmotte, A. The surprising diversity of clostridial hydrogenases: a comparative genomic perspective. *Microbiology* **156**, 1575–1588 (2010).

16. Atkinson, H. J., Morris, J. H., Ferrin, T. E. & Babbitt, P. C. Using sequence similarity networks for visualization of relationships across diverse protein superfamilies. *PLoS One* **4**, e4345 (2009).
17. Ahmed, F. H. *et al.* Sequence-structure-function classification of a catalytically diverse oxidoreductase superfamily in mycobacteria. *J. Mol. Biol.* **427**, 3554–3571 (2015).
18. Ney, B. *et al.* The methanogenic redox cofactor F<sub>420</sub> is widely synthesized by aerobic soil bacteria. *ISME J.* In press (2016).
19. Kim, Y. J. *et al.* Formate-driven growth coupled with H<sub>2</sub> production. *Nature* **467**, 352–5 (2010).
20. McTernan, P. M. *et al.* Intact functional fourteen-subunit respiratory membrane-bound [NiFe]-hydrogenase complex of the hyperthermophilic archaeon *Pyrococcus furiosus*. *J. Biol. Chem.* **289**, 19364–19372 (2014).
21. Lie, T. J. *et al.* Essential anaplerotic role for the energy-converting hydrogenase Eha in hydrogenotrophic methanogenesis. *Proc. Natl. Acad. Sci. U. S. A.* **109**, 15473–8 (2012).
22. Constant, P., Chowdhury, S. P., Pratscher, J. & Conrad, R. Streptomyces contributing to atmospheric molecular hydrogen soil uptake are widespread and encode a putative high-affinity [NiFe]-hydrogenase. *Environ. Microbiol.* **12**, 821–829 (2010).
23. Stetter, K. O. *Archaeoglobus fulgidus* gen. nov., sp. nov.: a new taxon of extremely thermophilic archaebacteria. *Syst. Appl. Microbiol.* **10**, 172–173 (1988).
24. Deppenmeier, U. & Blaut, M. Analysis of the vhoGAC and vhtGAC operons from *Methanosarcina mazei* strain Gö1, both encoding a membrane-bound hydrogenase and a cytochrome b. *Eur. J. Biochem.* **269**, 261–269 (1995).
25. Auernik, K. S. & Kelly, R. M. Physiological versatility of the extremely thermoacidophilic archaeon *Metallosphaera sedula* supported by transcriptomic analysis of heterotrophic, autotrophic, and mixotrophic growth. *Appl. Environ. Microbiol.* **76**, 931–935 (2010).
26. Giaveno, M. A., Urbieto, M. S., Ulloa, J. R., González Toril, E. & Donati, E. R. Physiologic versatility and growth flexibility as the Main characteristics of a novel thermoacidophilic *Acidianus* strain isolated from Copahue geothermal area in Argentina. *Microb. Ecol.* **65**, 336–

- 346 (2012).
27. Marchler-Bauer, A. & Bryant, S. H. CD-Search: protein domain annotations on the fly. *Nucleic Acids Res.* **32**, W327–31 (2004).
28. Berney, M., Greening, C., Hards, K., Collins, D. & Cook, G. M. Three different [NiFe] hydrogenases confer metabolic flexibility in the obligate aerobe *Mycobacterium smegmatis*. *Environ. Microbiol.* **16**, 318–330 (2014).
29. Greening, C. *et al.* Persistence of the dominant soil phylum *Acidobacteria* by trace gas scavenging. *Proc. Natl. Acad. Sci.* **112**, 10497–10502 (2015).
30. Chen, Z. *et al.* *Phaeodactylibacter xiamenensis* gen. nov., sp. nov., a member of the family *Saprospiraceae* isolated from the marine alga *Phaeodactylum tricornutum*. *Int. J. Syst. Evol. Microbiol.* **64**, 3496–3502 (2014).
31. Koch, H. *et al.* Growth of nitrite-oxidizing bacteria by aerobic hydrogen oxidation. *Science* **345**, 1052–1054 (2014).
32. Hamann, E. *et al.* Environmental *Breviatea* harbour mutualistic *Arcobacter* epibionts. *Nature* **534**, 254–258 (2016).
33. Haroon, M. F. *et al.* Anaerobic oxidation of methane coupled to nitrate reduction in a novel archaeal lineage. *Nature* **500**, 567–70 (2013).
34. Evans, P. N. *et al.* Methane metabolism in the archaeal phylum *Bathyarchaeota* revealed by genome-centric metagenomics. *Science* **350**, 434–438 (2015).
35. Brown, C. T. *et al.* Unusual biology across a group comprising more than 15% of domain *Bacteria*. *Nature* **523**, 208–211 (2015).
36. Spang, A. *et al.* Complex archaea that bridge the gap between prokaryotes and eukaryotes. *Nature* **521**, 173–179 (2015).
37. Elie-Fadrosh, E. A. *et al.* Global metagenomic survey reveals a new bacterial candidate phylum in geothermal springs. *Nat Commun* **7**, (2016).
38. Wilson, M. C. *et al.* An environmental bacterial taxon with a large and distinct metabolic repertoire. *Nature* **506**, 58–62 (2014).

39. Greening, C. & Cook, G. M. Integration of hydrogenase expression and hydrogen sensing in bacterial cell physiology. *Curr. Opin. Microbiol.* **18**, 30–8 (2014).
40. Greening, C. *et al.* Physiology, biochemistry, and applications of F<sub>420</sub>- and F<sub>o</sub>-dependent redox reactions. *Microbiol. Mol. Biol. Rev.* **80**, 451–493 (2016).
41. Sousa, F. L., Neukirchen, S., Allen, J. F., Lane, N. & Martin, W. F. Lokiarchaeon is hydrogen dependent. *Nat. Microbiol.* **1**, 16034 (2016).
42. Markowitz, V. M. *et al.* IMG: the integrated microbial genomes database and comparative analysis system. *Nucleic Acids Research* **40**, D115–22 (2012).
43. Cover, T. & Hart, P. Nearest neighbor pattern classification. *IEEE Trans. Inf. Theory* **13**, (1967).

## Supporting Information

**Figure S1.** Sequence similarity networks showing the relationships between closely related subgroups of [NiFe]-hydrogenases as narrow logE filters.

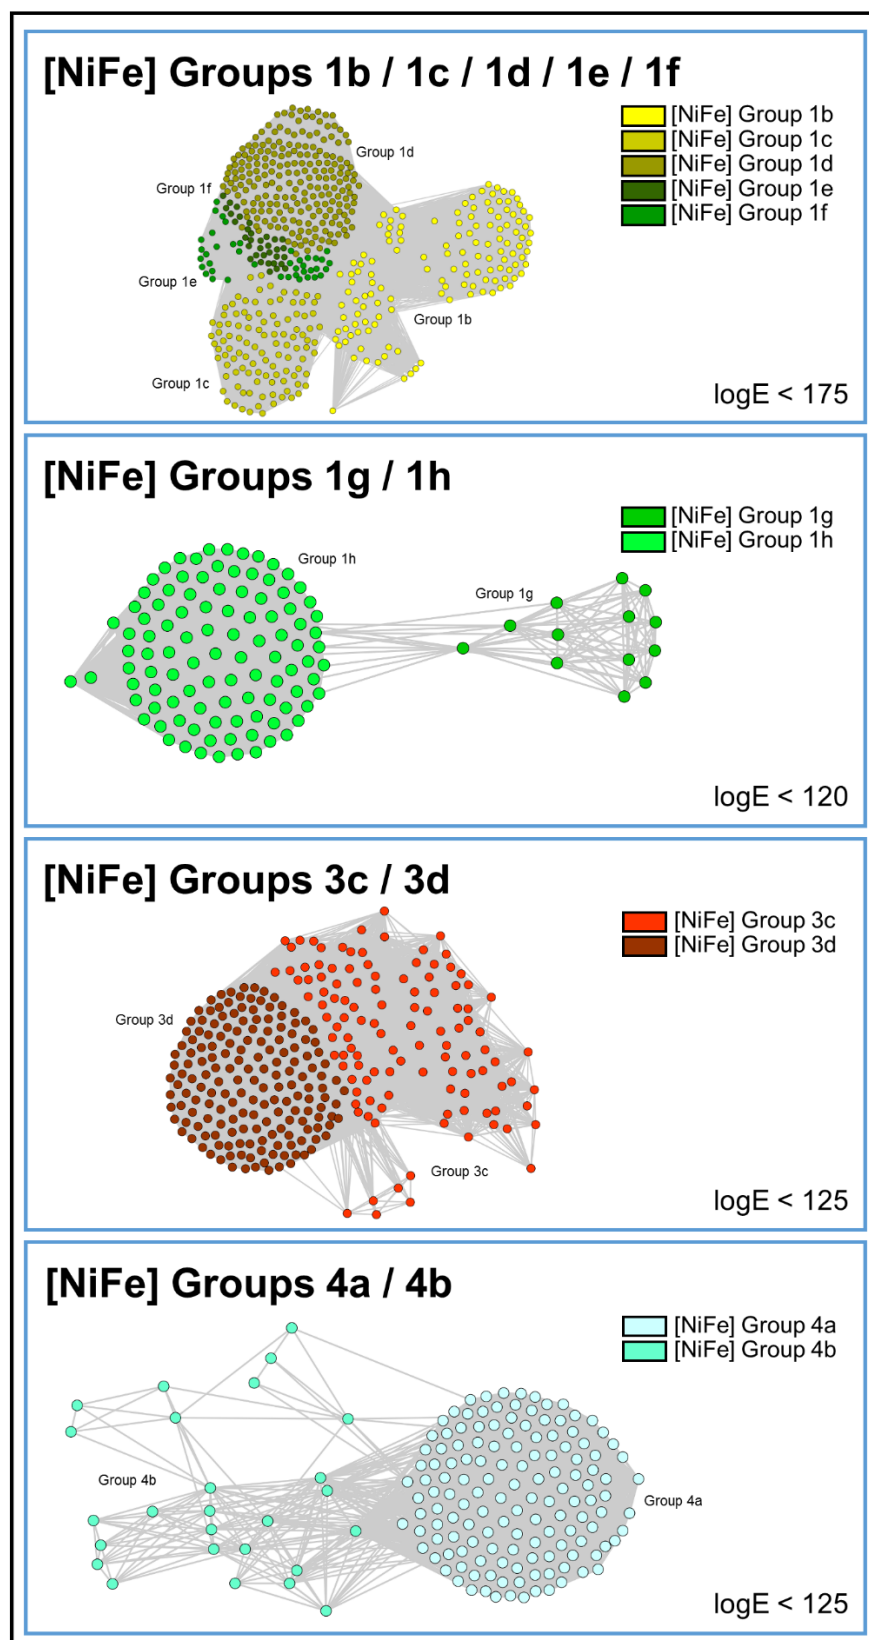

**Figure S2.** Screenshot showing interface of HydDB classification page.

HydDB

Classify

Browse

Information Pages

## Classify

HydDB provides access to an accurate classifier for hydrogenase sequences and a curated database of hydrogenases by known type. The service is provided by the School of Biological Sciences, Monash University and the Bioinformatics Research Centre, Aarhus University.

Classify

Sequences

Sequences File

Choose file No file chosen

☐ Check sequences using CDD?

If enabled, HydDB will use CDD to check whether the submitted sequences encode catalytic subunits of putative before classification. Since this step is time-consuming, you may want to uncheck this option if you are certain your sequences encode hydrogenase catalytic subunits.

Mail

If an e-mail address is provided, a mail will be sent when the job succeeds or fails.

Submit Job!

Instructions

To use the classifier to predict the type of one or more hydrogenases from sequence, either:

- paste your FASTA-formatted protein sequences into the text area, or
- upload a FASTA-formatted file with your protein sequences.

Press the "Submit" button to upload the sequences and begin the classification.

If you provided an e-mail address you will receive an e-mail when your job finishes or fails including a link to the results. You will also be able to download the results as a CSV file.

Only sequences encoding the catalytic subunits of hydrogenases will be classified, i.e. those binding the [NiFe]-centre (NiFe-hydrogenases), [FeFe]-centre (FeFe-hydrogenases), or [Fe]-centre (Fe-hydrogenases). Electron-transfer subunits, accessory proteins, and maturation factors cannot be classified by this service.

Limits

A job can at most run for 2 hours. This should be enough for about 2500 sequences to be classified. Results will be stored for 2 weeks. However, we recommend to download the results as they may be deleted due to the rare event of a power outage or server crash.

Statistics

|                                           |     |
|-------------------------------------------|-----|
| Jobs completed in total                   | 40  |
| Sequences classified in total             | 232 |
| Jobs completed in the last 24 hours       | 0   |
| Sequences classified in the last 24 hours | 0   |

**Figure S3.** Screenshot showing the information provided in the data entry pages for 3248 individual hydrogenases in HydDB.

HydDB
Classify
Browse
Information Pages

## Entry WP\_004030875.1

|                                |                             |
|--------------------------------|-----------------------------|
| Phylum                         | Euryarchaeota               |
| Order                          | Methanobacteriales          |
| Organism                       | Methanobacterium formicicum |
| Hydrogenase                    | <a href="#">[Fe]</a>        |
| Activity (Predicted)           | Bidirectional               |
| Oxygen Tolerance (Predicted)   | Tolerant                    |
| Subunits (Predicted)           | 1                           |
| Metal Centres (Predicted)      | Fe ion                      |
| Accessory Subunits (Predicted) | None                        |

MKLAILGAGCYRTHAASGITNFSRACEVAEQVGKPEIAMTHSTIAMGAELKELAGIDEIVVSDPVFDNDFTVIDDFEYEAIVIEAHHKDPESIMPQIREKVNNAVAKDLPKPPKG  
AIHFTHPEDLGFEVTTDDNEAVQDADWMTWFPKGDMMQMGIIKEFADNLKEGAILTHACTVPTTTFQKIFEDLSSDEMNIAPKVNVSYPHGAPEMKGQVYIAEGYASEDAI  
CKLVDWGVAAAGDAFKLPAELLGPVCDMCSALTAITYAGILSYRDSVMNII LGAPAGFAQWIAKESLTQVTDLMNSVGIDHIEEKLDPGALLGTADSMNFGAAADVLPVLEVL  
ENRKGKGPTCNI



**Figure S4.** Screenshot showing the capacity for browsing hydrogenase data entries in HydDB.

HydDB
Classify
Browse
Information Pages

## Browse

Filter (matches 3248 entries)
Download

Phylum
Any
Order
Organism
Ncbi accession
Hydrogenase class
Any

Subunits predicted
Any
Oxygen tolerance predicted
Any
Activity predicted
Any
Metal centres predicted
Any

Apply
Clear

| NCBI Accession | Organism                               | Hydrogenase Class | Phylum        | Order              | Activity (Predicted) | Oxygen Tolerance (Predicted) | Subunits (Predicted) | Metal Centres (Predicted) | Accessory Subunits (Predicted) |
|----------------|----------------------------------------|-------------------|---------------|--------------------|----------------------|------------------------------|----------------------|---------------------------|--------------------------------|
| WP_004030875.1 | Methanobacterium formicum              | [Fe]              | Euryarchaeota | Methanobacteriales | Bidirectional        | Tolerant                     | 1                    | Fe ion                    | None                           |
| WP_012955328.1 | Methanobrevibacter ruminantium         | [Fe]              | Euryarchaeota | Methanobacteriales | Bidirectional        | Tolerant                     | 1                    | Fe ion                    | None                           |
| WP_019263574.1 | Methanobrevibacter smithii             | [Fe]              | Euryarchaeota | Methanobacteriales | Bidirectional        | Tolerant                     | 1                    | Fe ion                    | None                           |
| WP_016357634.1 | Methanobrevibacter sp. AbM4            | [Fe]              | Euryarchaeota | Methanobacteriales | Bidirectional        | Tolerant                     | 1                    | Fe ion                    | None                           |
| WP_013296316.1 | Methanothermobacter marburgensis       | [Fe]              | Euryarchaeota | Methanobacteriales | Bidirectional        | Tolerant                     | 1                    | Fe ion                    | None                           |
| WP_010876766.1 | Methanothermobacter thermautotrophicus | [Fe]              | Euryarchaeota | Methanobacteriales | Bidirectional        | Tolerant                     | 1                    | Fe ion                    | None                           |
| WP_013413799.1 | Methanothermus fervidus                | [Fe]              | Euryarchaeota | Methanobacteriales | Bidirectional        | Tolerant                     | 1                    | Fe ion                    | None                           |

**Figure S5.** Screenshot showing the detailed content of the information pages about each hydrogenase class on HydDB. Equivalent information pages are available for all 38 hydrogenase classes defined in this work (**Table 1**).

## [NiFe] Group 1h-hydrogenase

This entry was last updated at: June 13, 2016, 11:11 a.m.

|                  |                                                                                                                                                                                                                                        |
|------------------|----------------------------------------------------------------------------------------------------------------------------------------------------------------------------------------------------------------------------------------|
| Properties       |                                                                                                                                                                                                                                        |
| Group            | [NiFe] Group 1: Respiratory H <sub>2</sub> -uptake [NiFe] hydrogenases                                                                                                                                                                 |
| Subgroup         | [NiFe] Group 1h: Actinobacteria-type                                                                                                                                                                                                   |
| Function         | Hydrogenotrophic respiration using O <sub>2</sub> as terminal electron acceptor. Enzyme scavenges electrons from atmospheric H <sub>2</sub> to fuel respiratory chain during carbon-starvation. Route of electron transfer unresolved. |
| Activity         | H <sub>2</sub> -uptake (unidirectional, high-affinity)                                                                                                                                                                                 |
| Oxygen tolerance | O <sub>2</sub> -tolerant or O <sub>2</sub> -insensitive                                                                                                                                                                                |
| Localisation     | Membrane-associated?                                                                                                                                                                                                                   |

|                        |                                                                                                              |
|------------------------|--------------------------------------------------------------------------------------------------------------|
| Distribution           |                                                                                                              |
| Ecosystem distribution | Upland soils, plant tissues, possibly surface waters                                                         |
| Taxonomic distribution | Widespread among obligately aerobic soil bacteria, especially Actinobacteria, Acidobacteria, and Chloroflexi |

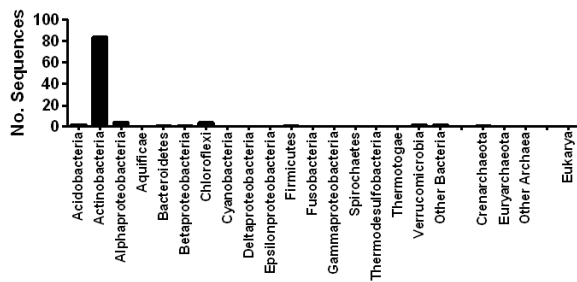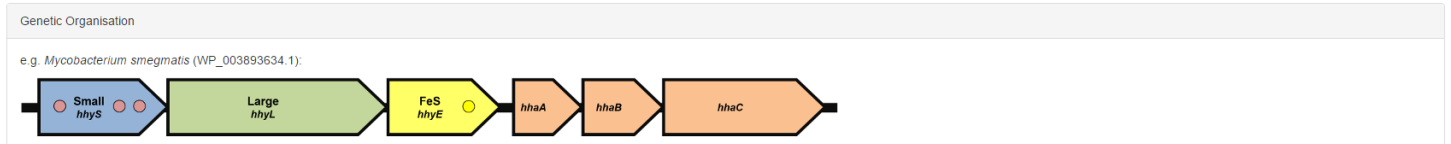

|                     |                                                                                                                                                                                           |
|---------------------|-------------------------------------------------------------------------------------------------------------------------------------------------------------------------------------------|
| Architecture        |                                                                                                                                                                                           |
| Structures          | 5AA5 ( <i>Ralstonia eutropha</i> , 2.5 Å resolution, active)                                                                                                                              |
| Subunits            | 3?                                                                                                                                                                                        |
| Subunit description | H <sub>2</sub> L (hydrogenase large subunit)<br>H <sub>2</sub> S (hydrogenase small subunit) H <sub>2</sub> E (putative iron-sulfur protein and proposed physiological electron acceptor) |
| Catalytic site      | [NiFe]-centre                                                                                                                                                                             |
| FeS clusters        | Proximal: 3Cys1Asp(4Fe4S)<br>Medial: 4Cys(4Fe4S)<br>Distal: 3Cys1His(4Fe4S)                                                                                                               |

|                                                                                                                                                                                                                                                                                                                                                     |  |
|-----------------------------------------------------------------------------------------------------------------------------------------------------------------------------------------------------------------------------------------------------------------------------------------------------------------------------------------------------|--|
| Important Notes                                                                                                                                                                                                                                                                                                                                     |  |
| The <i>Robiginitalea biformata</i> and <i>Sulfolobus islandicus</i> enzymes are relatively to distantly related to the main group. No studies have yet tested whether these enzymes have a H <sub>2</sub> -scavenging role like other Group 1h [NiFe]-hydrogenases. They may instead represent founding members of a functionally-distinct lineage. |  |

| Sequences in this class |                                         |                   |                |                  |                      |                              |                      |                                     |                                |
|-------------------------|-----------------------------------------|-------------------|----------------|------------------|----------------------|------------------------------|----------------------|-------------------------------------|--------------------------------|
| NCBI Accession          | Organism                                | Hydrogenase Class | Phylum         | Order            | Activity (Predicted) | Oxygen Tolerance (Predicted) | Subunits (Predicted) | Metal Centres (Predicted)           | Accessory Subunits (Predicted) |
| WP_014267363.1          | <i>Granulicella mallensis</i>           | [NiFe] Group 1h   | Acidobacteria  | Acidobacteriales | Aerobic Uptake       | Tolerant                     | 3                    | [NiFe]-centre, 3 x [4Fe4S] clusters | [FeS] protein                  |
| WP_011688202.1          | <i>Solibacter usitatus</i>              | [NiFe] Group 1h   | Acidobacteria  | Solibacterales   | Aerobic Uptake       | Tolerant                     | 3                    | [NiFe]-centre, 3 x [4Fe4S] clusters | [FeS] protein                  |
| WP_021597135.1          | <i>Actinomadura madurae</i>             | [NiFe] Group 1h   | Actinobacteria | Actinomycetales  | Aerobic Uptake       | Tolerant                     | 3                    | [NiFe]-centre, 3 x [4Fe4S] clusters | [FeS] protein                  |
| WP_026402909.1          | <i>Actinomadura rifamycinii</i>         | [NiFe] Group 1h   | Actinobacteria | Actinomycetales  | Aerobic Uptake       | Tolerant                     | 3                    | [NiFe]-centre, 3 x [4Fe4S] clusters | [FeS] protein                  |
| WP_018330638.1          | <i>Actinomycetospira chiangmaiensis</i> | [NiFe] Group 1h   | Actinobacteria | Actinomycetales  | Aerobic Uptake       | Tolerant                     | 3                    | [NiFe]-centre, 3 x [4Fe4S] clusters | [FeS] protein                  |
| WP_007735075.1          | <i>Rhodococcus qingshengii</i>          | [NiFe] Group 1h   | Actinobacteria | Actinomycetales  | Aerobic Uptake       | Tolerant                     | 3                    | [NiFe]-centre, 3 x [4Fe4S] clusters | [FeS] protein                  |
| WP_003935326.1          | <i>Rhodococcus ruber</i>                | [NiFe] Group 1h   | Actinobacteria | Actinomycetales  | Aerobic Uptake       | Tolerant                     | 3                    | [NiFe]-centre, 3 x [4Fe4S] clusters | [FeS] protein                  |
| WP_005443931.1          | <i>Saccharomonospora azurea</i>         | [NiFe] Group 1h   | Actinobacteria | Actinomycetales  | Aerobic Uptake       | Tolerant                     | 3                    | [NiFe]-centre, 3 x [4Fe4S] clusters | [FeS] protein                  |

## Literature

### Genetics:

- Berney, M., Greening, C., Hards, K., Collins, D., and Cook, G.M. (2014) Three different [NiFe] hydrogenases confer metabolic flexibility in the obligate aerobe *Mycobacterium smegmatis*. *Environ. Microbiol.* **16**: 318-330.
- Constant, P., Chowdhury, S.P., Hesse, L., and Conrad, R. (2011) Co-localization of atmospheric H<sub>2</sub> oxidation activity and high affinity H<sub>2</sub>-oxidizing bacteria in non-axenic soil and sterile soil amended with *Streptomyces* sp. PCB7. *Soil Biol. Biochem.* **43**: 1888-1893.
- Constant, P., Chowdhury, S.P., Hesse, L., Pratscher, J., and Conrad, R. (2011) Genome data mining and soil survey for the novel group 5 [NiFe]-hydrogenase to explore the diversity and ecological importance of presumptive high-affinity H<sub>2</sub>-oxidizing bacteria. *Appl. Environ. Microbiol.* **77**: 6027-6035.
- Greening, C., Biswas, A., Carere, C.R., Jackson, C.J., Taylor, M.C., Stott, M.B., Cook, G.M., and Morales, S.E. (2016) Genomic and metagenomic surveys of hydrogenase distribution indicate H<sub>2</sub> is a widely utilised energy source for microbial growth and survival. *ISME J.* **10**: 761-777.
- Khdir, M., Hesse, L., Popa, M.E., Quiza, L., Lalonde, I., Meredith, L.K., Röckmann, T., and Constant, P. (2015) Soil carbon content and relative abundance of high affinity H<sub>2</sub>-oxidizing bacteria predict atmospheric H<sub>2</sub> soil uptake activity better than soil microbial community composition. *Soil Biol. Biochem.* **85**: 1-9.

### Physiology:

- Berney, M., Greening, C., Conrad, R., Jacobs, W.R., and Cook, G.M. (2014) An obligately aerobic soil bacterium activates fermentative hydrogen production to survive reductive stress during hypoxia. *Proc. Natl. Acad. Sci. U. S. A.* **111**: 11479-11484.
- Constant, P., Chowdhury, S.P., Pratscher, J., and Conrad, R. (2010) *Streptomyces* contributing to atmospheric molecular hydrogen soil uptake are widespread and encode a putative high-affinity [NiFe]-hydrogenase. *Environ. Microbiol.* **12**: 821-829.

**Table S1.** Hydrogenase sequences where there is disagreement between classification by SSN and *k*-NN methods. These sequences represent six out of the total 3248 sequences analyzed, i.e. 0.0018%.

| NCBI Accession | Organism                       | <i>k</i> -NN Classification | SSN Classification |
|----------------|--------------------------------|-----------------------------|--------------------|
| WP_027414715.1 | Aneurinibacillus terranovensis | [NiFe] Group 1e             | [NiFe] Group 1d    |
| WP_027358538.1 | Desulforegula conservatrix     | [NiFe] Group 3d             | [NiFe] Group 3c    |
| WP_012532312.1 | Geobacter bemidjiensis         | [NiFe] Group 3d             | [NiFe] Group 3c    |
| WP_012469611.1 | Geobacter lovleyi              | [NiFe] Group 3d             | [NiFe] Group 3c    |
| WP_004512544.1 | Geobacter metallireducens      | [NiFe] Group 3d             | [NiFe] Group 3c    |
| WP_015839165.1 | Geobacter sp. M21              | [NiFe] Group 3d             | [NiFe] Group 3c    |

**Dataset S1.** Excel spreadsheet listing the sequence, taxonomy, and hydrogenase class of all 3248 hydrogenase catalytic subunit sequences listed in HydDB
